# Supplementary material for: Endothelial cell-type-specific molecular requirements for angiogenesis drive fenestrated vessel development in the brain
Source: eLife. 2021 Jan 18;10:e64295. doi: 10.7554/eLife.64295 (PMC7840183; doi:10.7554/eLife.64295)
Supplement: Figure 1—source data 1. [file elife-64295-fig1-data1.xlsx]

## Sheet: Sheet1
	Analysis of 54 hpf embryos of indicated genotype						Quantifications of DLV lengths (µm)
	DLV lengths (µm) of all embryos are presented. 0 means the "No DLV" phenotype.						DLV lengths (µm) of only the embryos with the DLV are presented.
	54 hpf	Genotype					54 hpf	Genotype
	Embryo No.	WT	vegfab-/-	vegfc-/-	vegfd-/-		Embryo No.	WT	vegfab-/-	vegfc-/-	vegfd-/-
	1	44.73	0	0	46.03		1	44.73	37.9	13.17	46.03
	2	57.05	37.9	0	80.57		2	57.05	5.92	45.82	80.57
	3	50.48	5.92	0	63.02		3	50.48	40.92	66.18	63.02
	4	85.65	40.92	0	55.1		4	85.65	40.76	40.6	55.1
	5	80.02	40.76	13.17	52.77		5	80.02	13.65	48.44	52.77
	6	46.79	13.65	0	44.45		6	46.79	49.81	61.7	44.45
	7	47.31	0	45.82	28.59		7	47.31	43.81	57.84	28.59
	8	64.18	0	66.18	107.43		8	64.18	63.02	73.35	107.43
	9	45.66	49.81	0	79.44		9	45.66	41.02	62.93	79.44
	10	42.43	0	0	63.75		10	42.43	46.32	75.71	63.75
	11	51.68	43.81	0	48.89		11	51.68	29.09	94.1	48.89
	12	108.35	63.02	40.6	53.01		12	108.35			53.01
	13	39.33	0	48.44	0		13	39.33			62.92
	14	77.32	0	0	62.92		14	77.32			71.81
	15	54.62	41.02	0	71.81		15	54.62			68.6
	16	79.75	46.32	61.7	68.6		16	79.75			82
	17	70.01	0	57.84	82		17	70.01			72.52
	18	90.52	29.09	0	72.52		18	90.52			68.06
	19	98.82	0	73.35	68.06		19	98.82			57.22
	20	83.97	0	62.93	57.22		20	83.97			89.24
	21	77.3	0	75.71	89.24		21	77.3			64.41
	22		0	94.1	64.41		22				86.11
	23			0	86.11		23
	24			0			24
	25						25
	n	21	22	24	23		n	21	11	11	22
	No DLV	0	11	13	1		mean	66.4748	37.4745	58.1673	65.7245
	with DLV	21	11	11	22		SD	20.4254	16.1001	21.2352	17.6157
	No DLV (%)	0	50	54.1667	4.34783
	with DLV (%)	100	50	45.8333	95.6522
