# Supplementary material for: Endothelial cell-type-specific molecular requirements for angiogenesis drive fenestrated vessel development in the brain
Source: eLife. 2021 Jan 18;10:e64295. doi: 10.7554/eLife.64295 (PMC7840183; doi:10.7554/eLife.64295)
Supplement: Figure 4—source data 1. [file elife-64295-fig4-data1.xlsx]

## Sheet: Sheet1
	Analysis of 54 hpf embryos of indicated treatment					Quantifications of DLV lengths (µm)
	DLV lengths (µm) of all embryos are presented. 0 means the "No DLV" phenotype.					DLV lengths (µm) of only the embryos with the DLV are presented.
	54 hpf	Treatment				54 hpf	Treatment
	Embryo No.	uninjected	Cas9 control injection	ccbe1 crRNAs RNP injection		Embryo No.	uninjected	Cas9 control injection	ccbe1 crRNAs RNP injection
	1	71.68	84.75	45.19		1	71.68	84.75	45.19
	2	52.31	58.73	47.5		2	52.31	58.73	47.5
	3	51.37	53.14	0		3	51.37	53.14	59.08
	4	40.88	85.09	59.08		4	40.88	85.09	31.75
	5	55.21	64.78	0		5	55.21	64.78	83.86
	6	50.87	57.17	0		6	50.87	57.17	23.02
	7	38.57	50.19	31.75		7	38.57	50.19	60.28
	8	73.46	62.86	83.86		8	73.46	62.86	44.46
	9	73.9	58.59	23.02		9	73.9	58.59	49.44
	10	69.36	62.44	60.28		10	69.36	62.44	30.32
	11	61.57	52.31	44.46		11	61.57	52.31	55.26
	12	30.62	59.98	49.44		12	30.62	59.98	53.19
	13		36.96	30.32		13		36.96	21.64
	14		29.75	55.26		14		29.75	41.4
	15		52.57	53.19		15		52.57	48.57
	16		46.06	21.64		16		46.06	54.8
	17		37.35	41.4		17		37.35	82.42
	18		52.27	48.57		18		52.27	21.42
	19		31.57	54.8		19		31.57	59.23
	20		43.31	82.42		20		43.31	37.75
	21		27.43	21.42		21		27.43	106.78
	22		35.71	59.23		22		35.71	51.94
	23		44.01	37.75		23		44.01	41.13
	24		48.69	106.78		24		48.69	15.9
	25		38.85	0		25		38.85	76.77
	26		37.14	51.94		26		37.14	86.34
	27		59.92	41.13		27		59.92	62.7
	28		39.37	0		28		39.37	44.87
	29		43.82	0		29		43.82	48.18
	30		58.21	0		30		58.21	43.45
	31		51.85	15.9		31		51.85	23.05
	32		63.93	0		32		63.93	27.75
	33		58.76	0		33		58.76	43.35
	34		53.32	76.77		34		53.32	43.53
	35		44.24	0		35		44.24	17.06
	36		68.02	86.34		36		68.02	47.12
	37		72.97	0		37		72.97	41.9
	38		63.7	62.7		38		63.7	41.41
	39		59.48	0		39		59.48	26.66
	40			44.87		40			25.73
	41			48.18		41			29.93
	42			43.45		42			13.4
	43			23.05		43			13.47
	44			27.75		44			18.24
	45			43.35		45			22.51
	46			43.53		46			31.9
	47			0		47			66.91
	48			17.06		48			35.35
	49			0		49			31.42
	50			47.12		50			14.65
	51			41.9		51			34.54
	52			41.41		52			44.26
	53			26.66		53			25.59
	54			25.73		54			38.17
	55			29.93		55			41.82
	56			13.4		56			31.08
	57			13.47		57			43.06
	58			18.24		58			56.94
	59			22.51		59			50.38
	60			31.9		60			71.94
	61			0		61			71.58
	62			66.91		62			67.07
	63			35.35		63			64.39
	64			0
	65			31.42		n	12	39	63
	66			14.65		mean	55.8167	52.5459	44.2032
	67			34.54		SD	14.5189	13.5714	19.8477
	68			44.26
	69			25.59
	70			38.17
	71			41.82
	72			31.08
	73			43.06
	74			56.94
	75			50.38
	76			71.94
	77			71.58
	78			67.07
	79			64.39
	n	12	39	79
	No DLV	0	0	16
	with DLV	12	39	63
	No DLV (%)	0	0	20.2532
	with DLV (%)	100	100	79.7468
