# Supplementary figures and images for: Endothelial cell-type-specific molecular requirements for angiogenesis drive fenestrated vessel development in the brain
Source: eLife journal article supplement (doi:10.7554/elife.64295), 2021-01-18

Figure 6-figure supplement 1

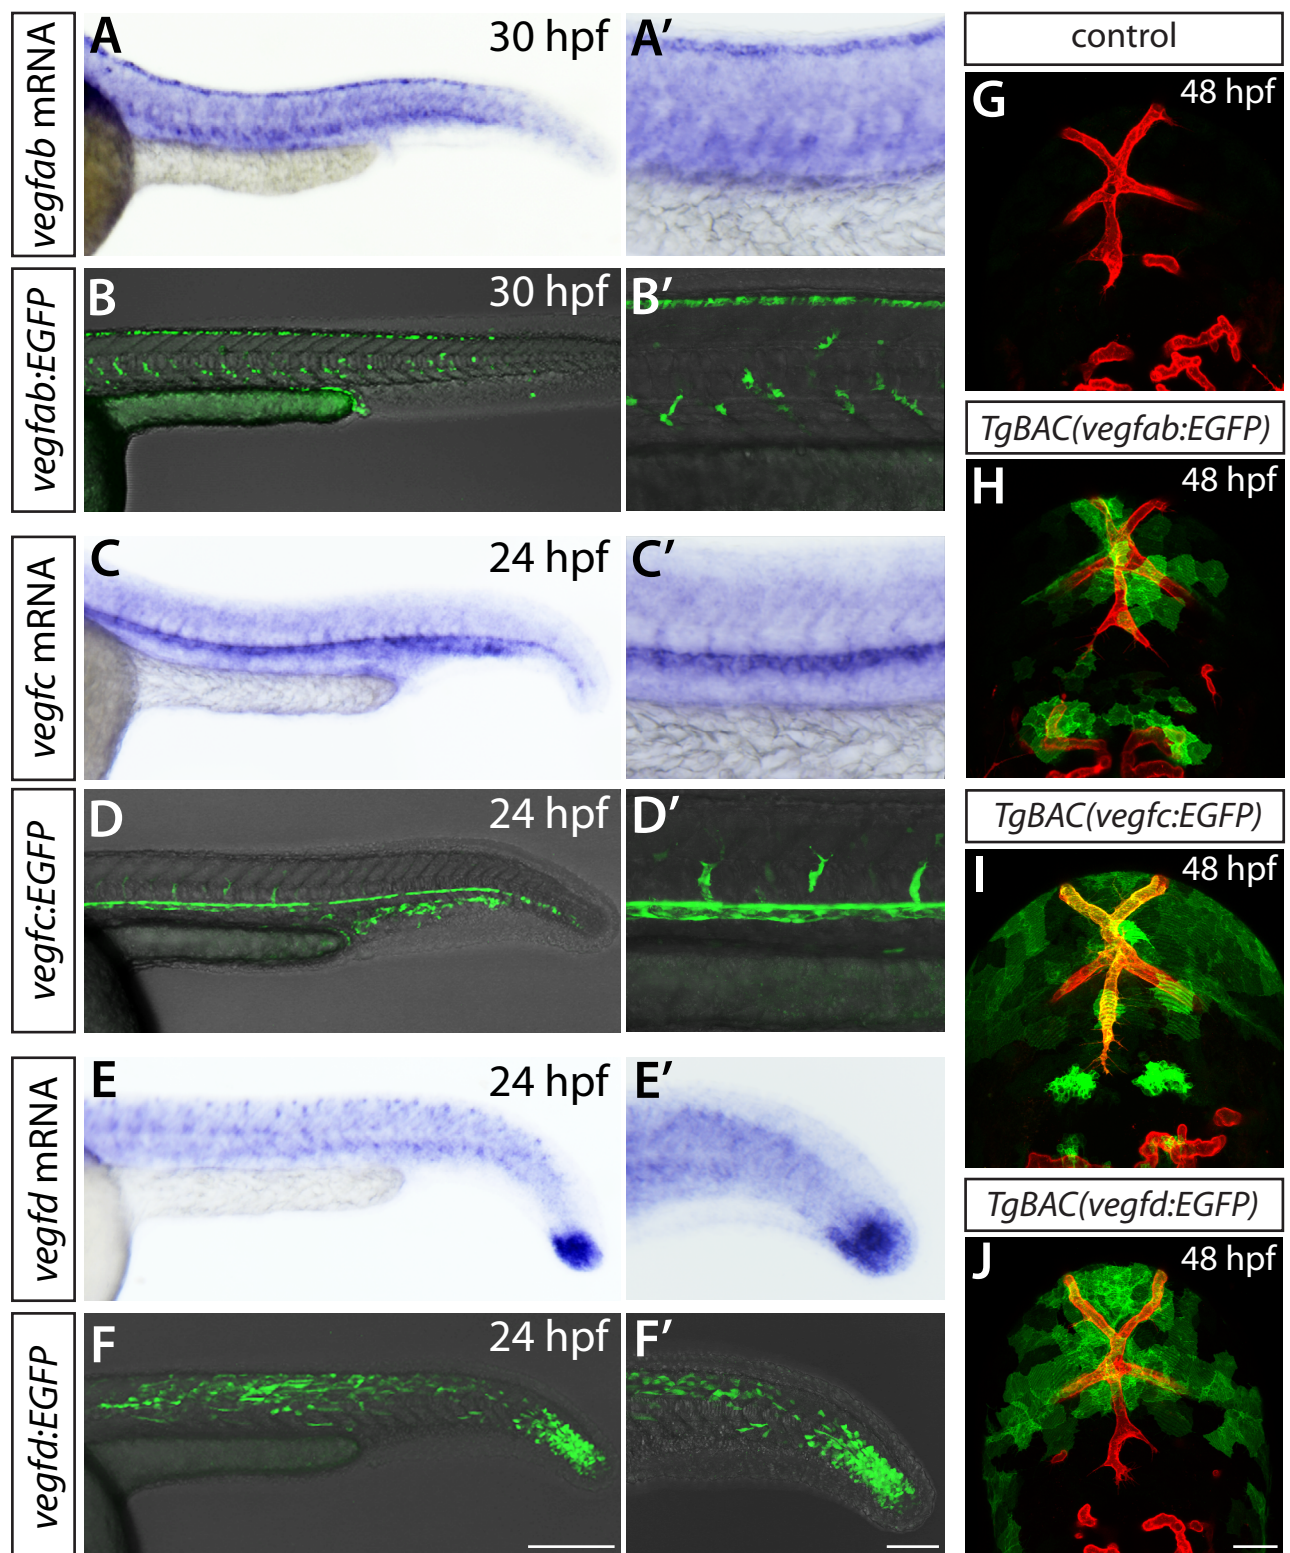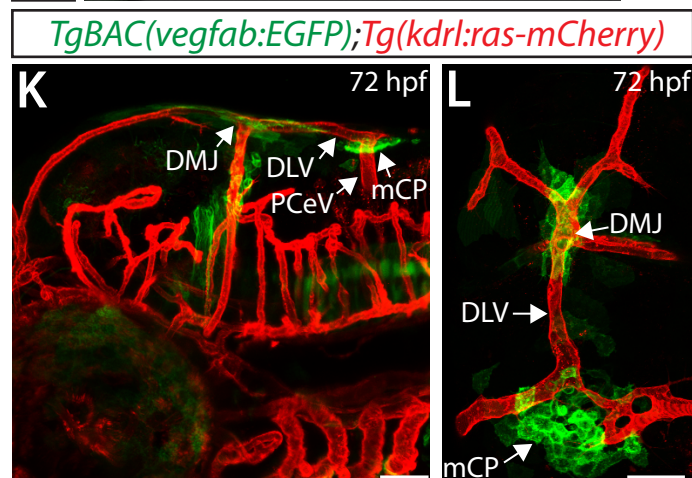

Supplement: supp [file elife-64295-supp-v1.zip]

Figure 6-figure supplement 4

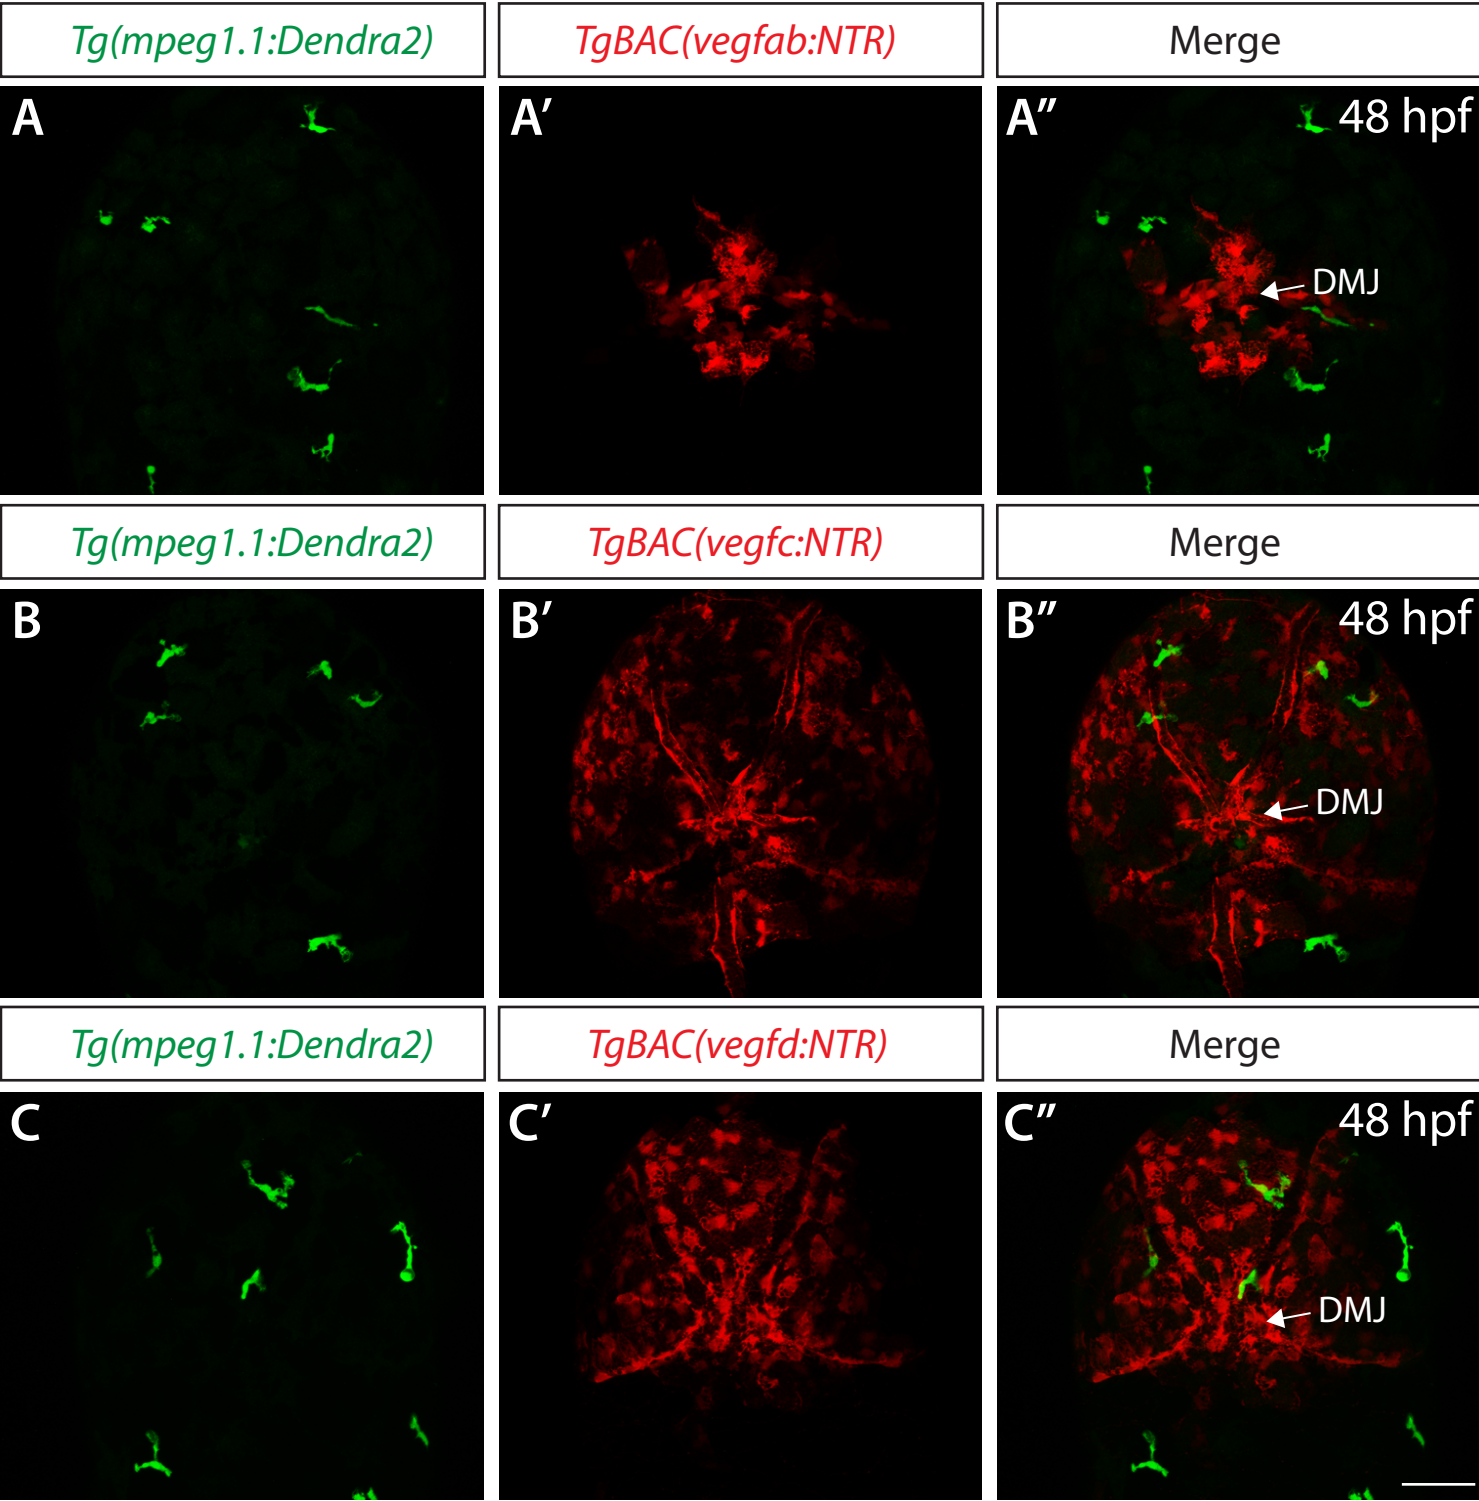

Supplement: supp [file elife-64295-supp-v1.zip]

Figure 6-figure supplement 2

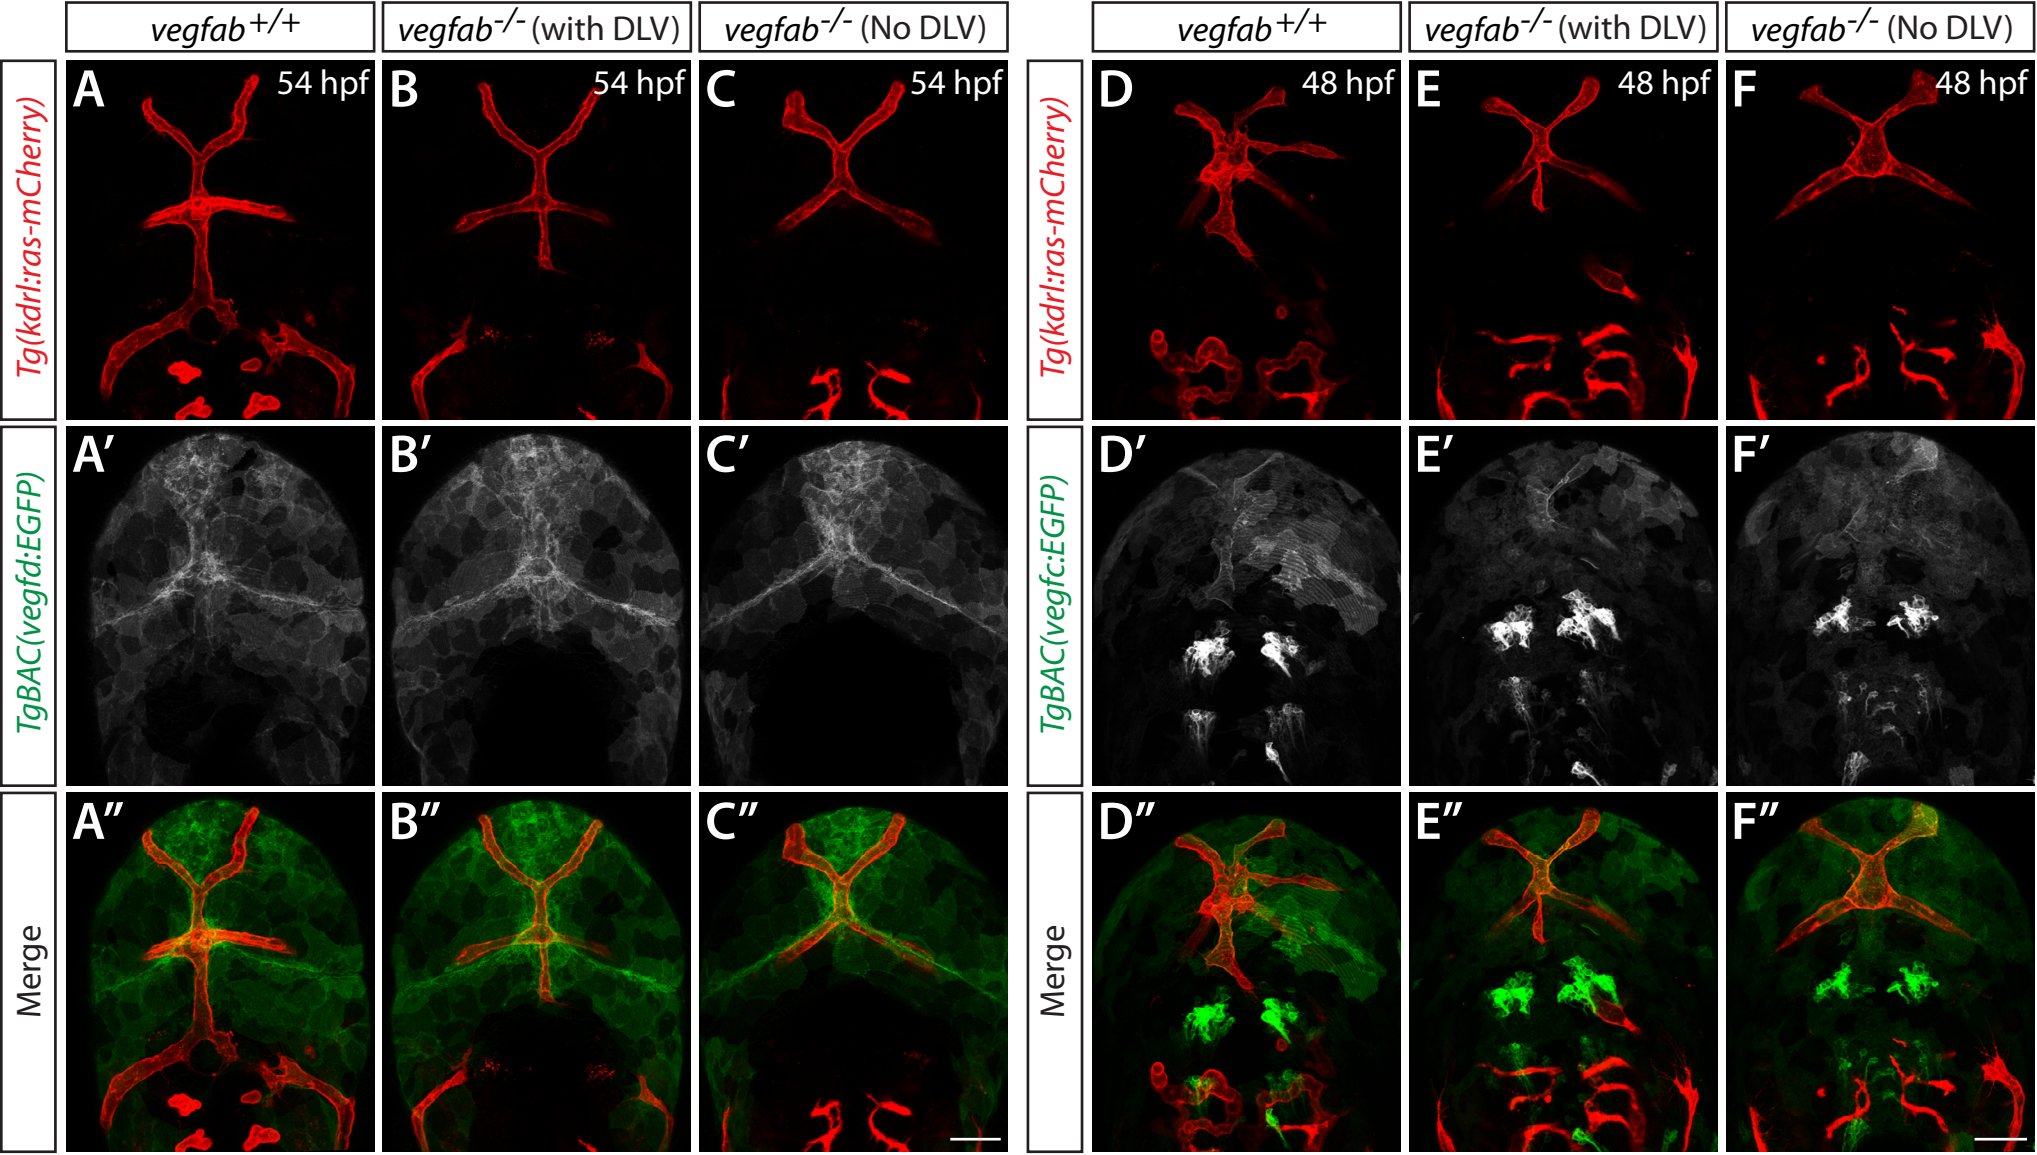

Supplement: supp [file elife-64295-supp-v1.zip]

Figure 5-figure supplement 1

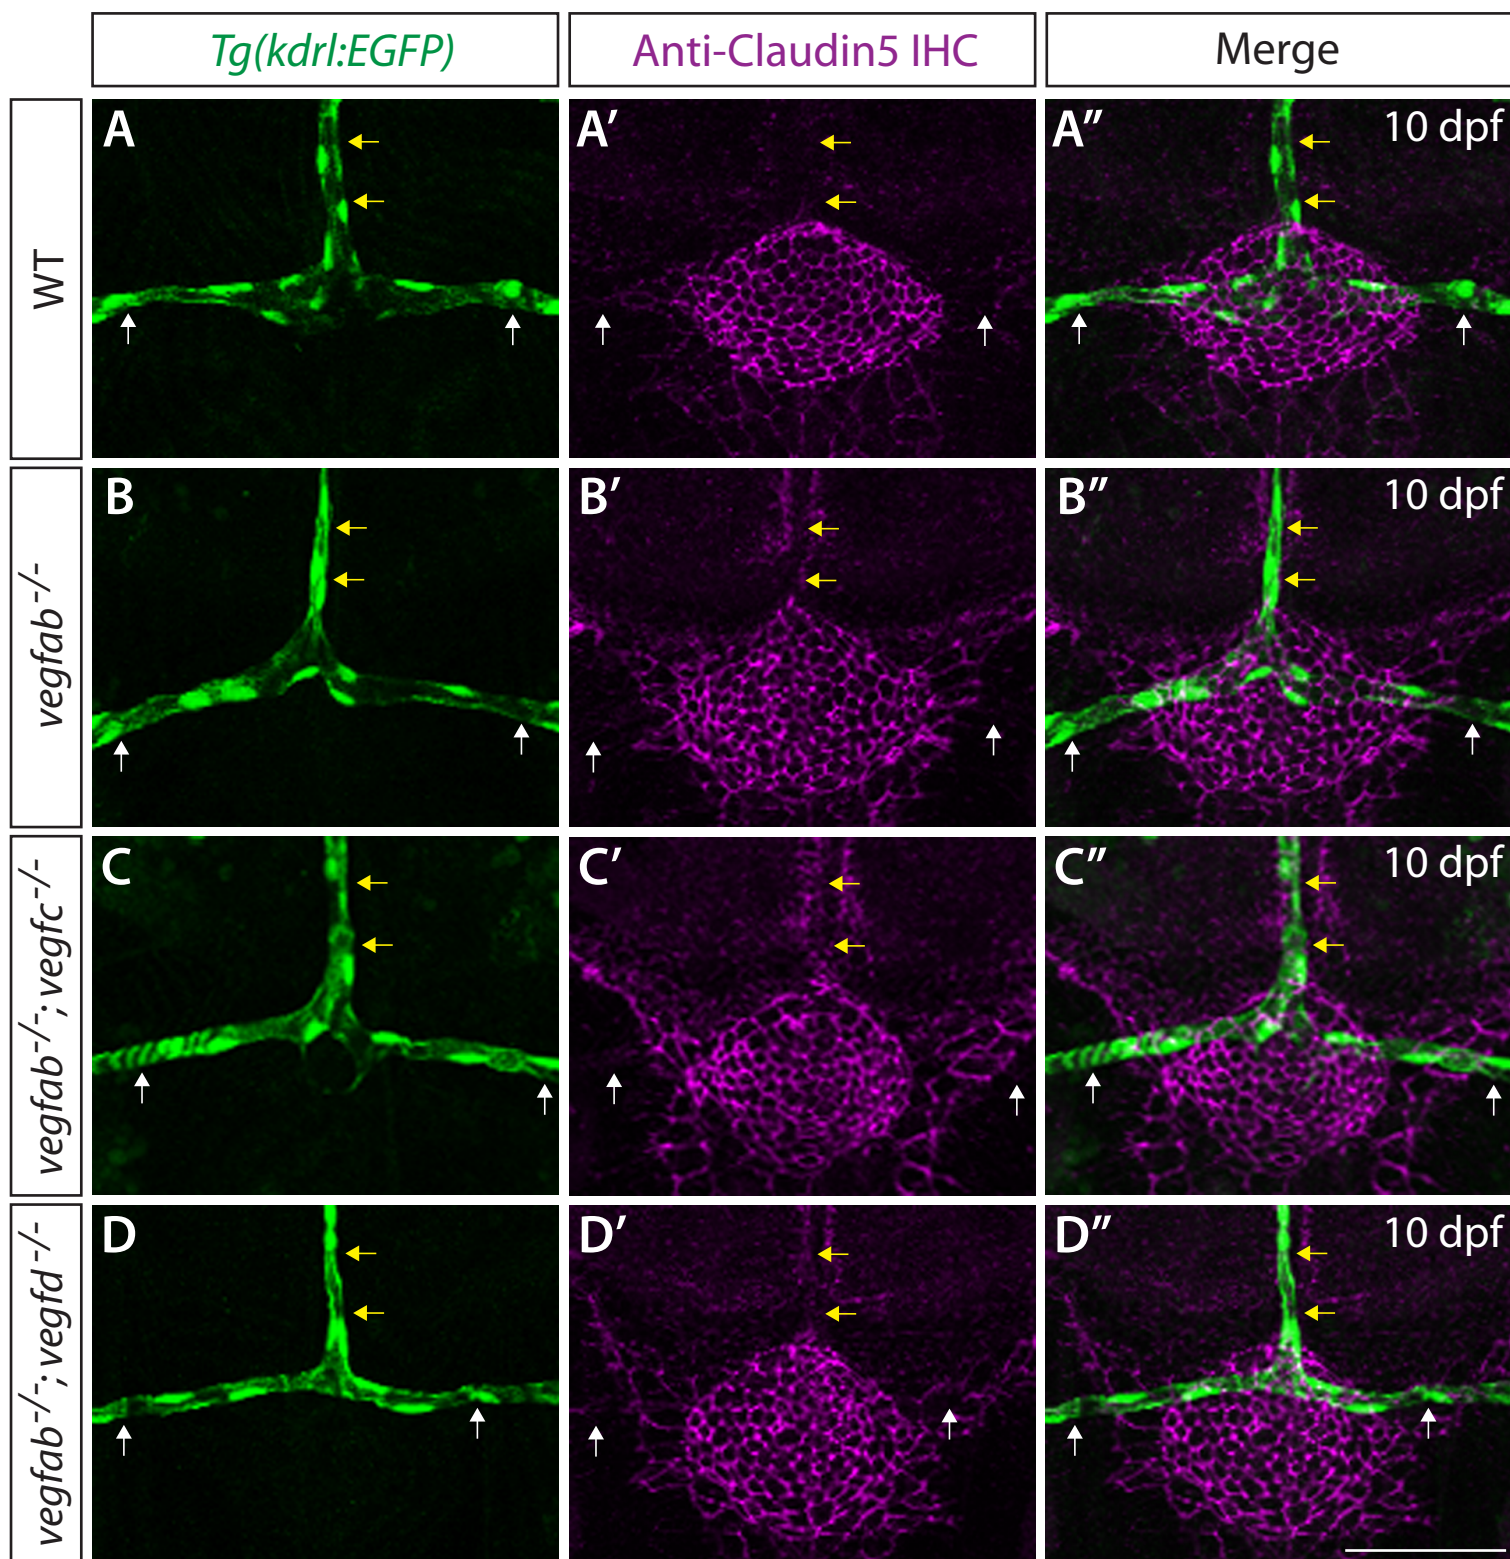

Supplement: supp [file elife-64295-supp-v1.zip]

Figure 1-figure supplement 1

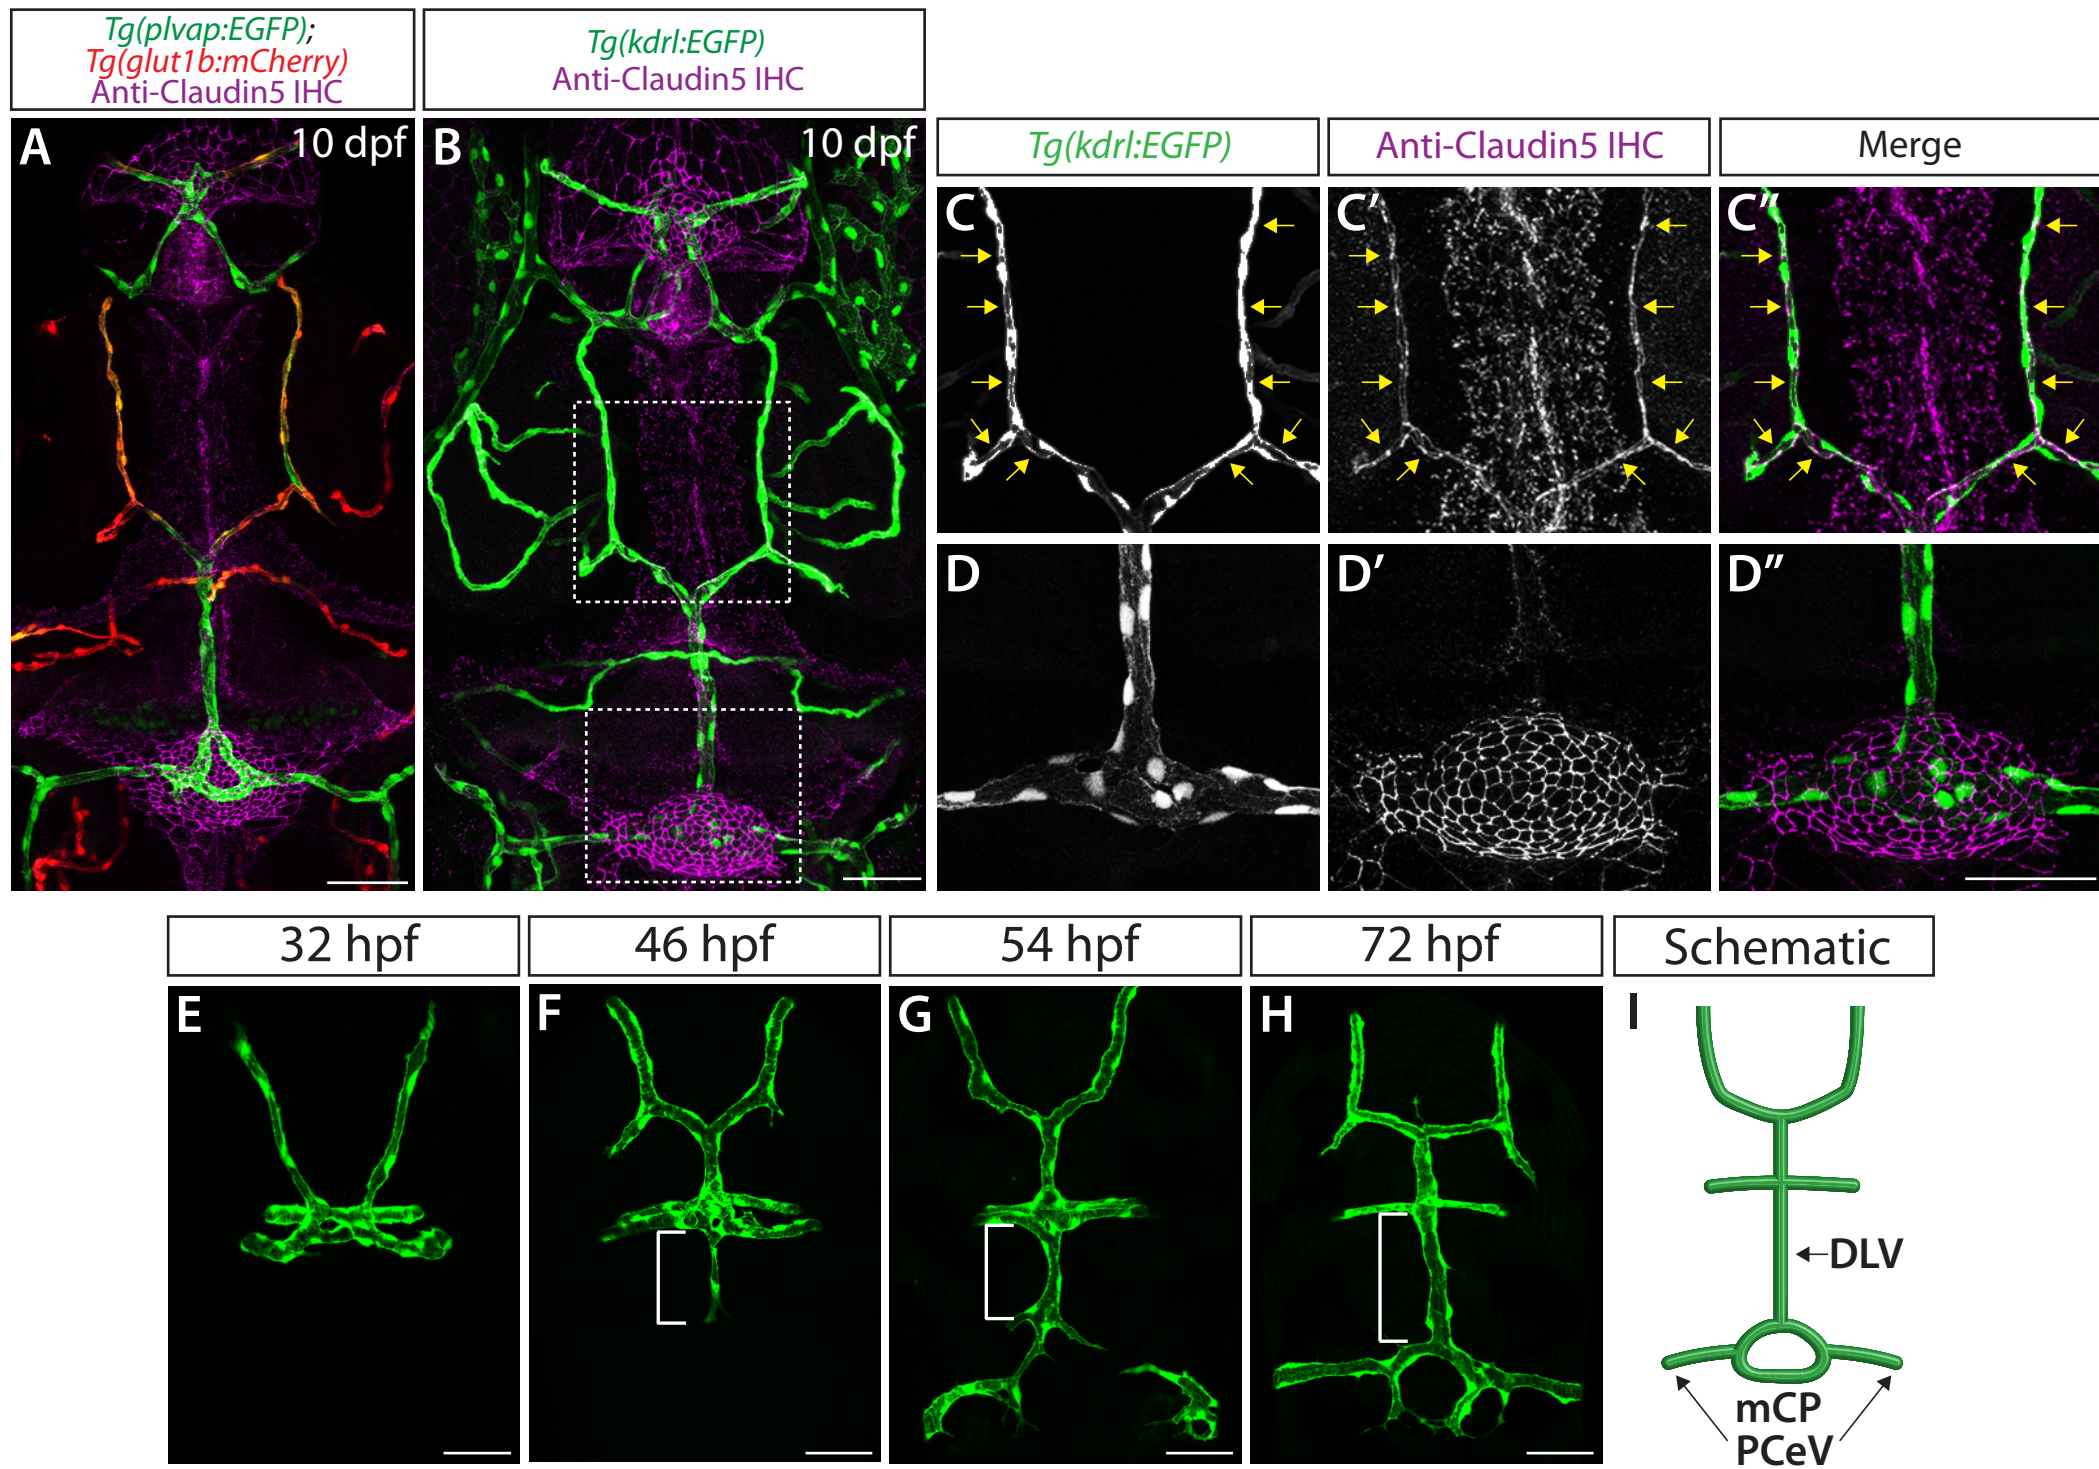

Supplement: supp [file elife-64295-supp-v1.zip]

Figure 1-figure supplement 3

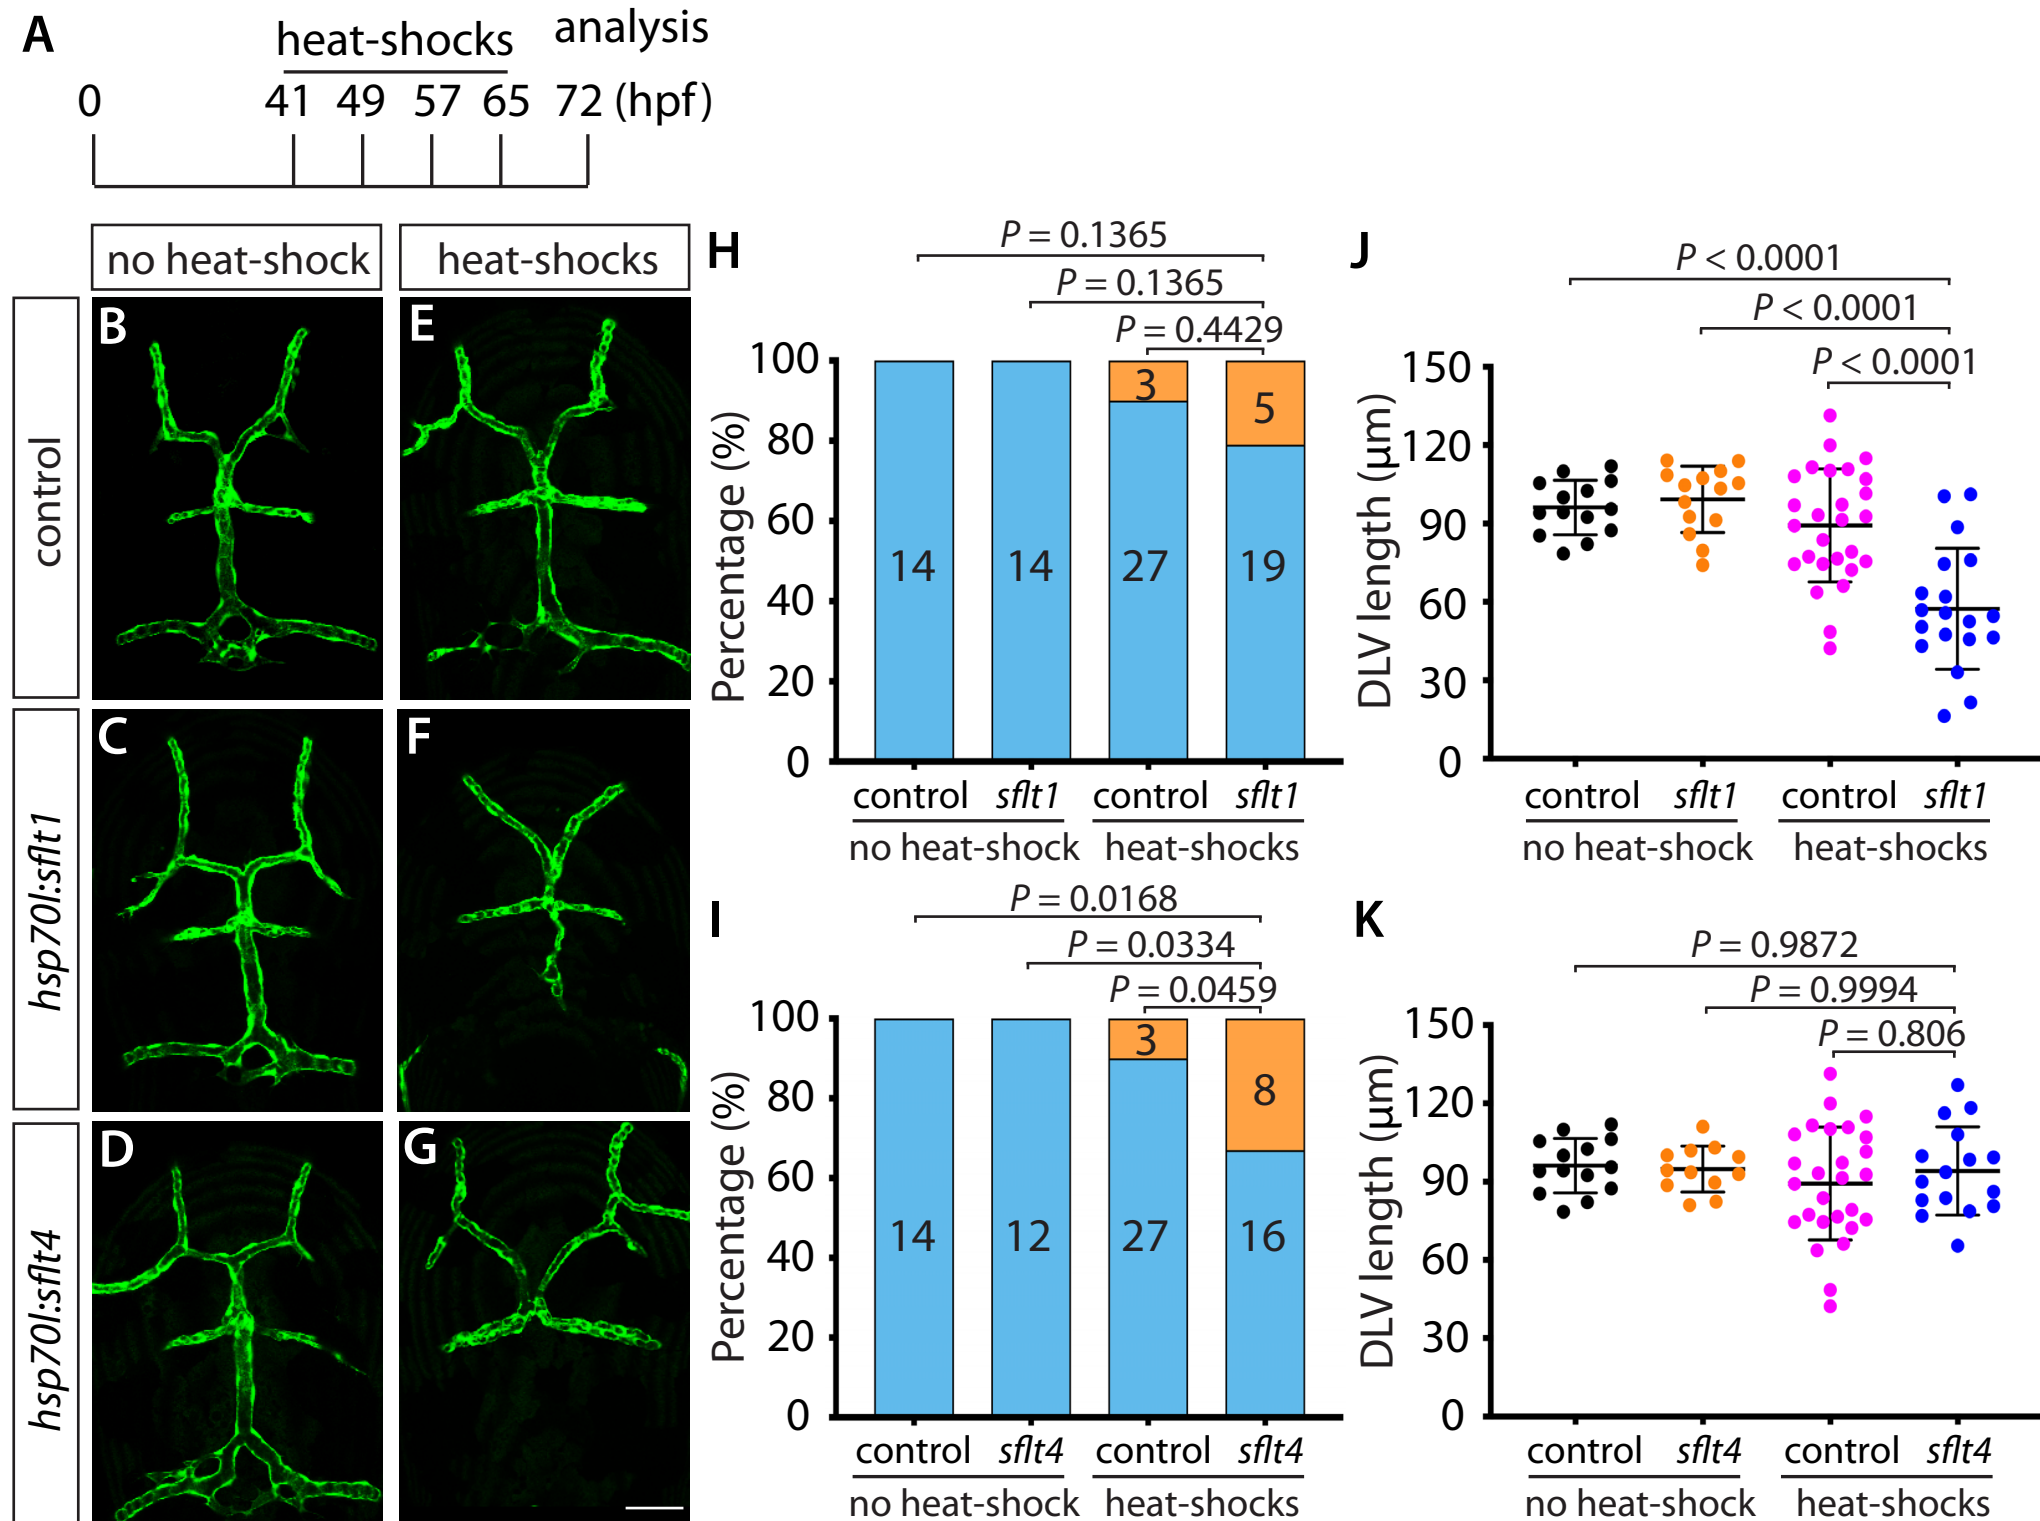

Supplement: supp [file elife-64295-supp-v1.zip]

Figure 3-figure supplement 1

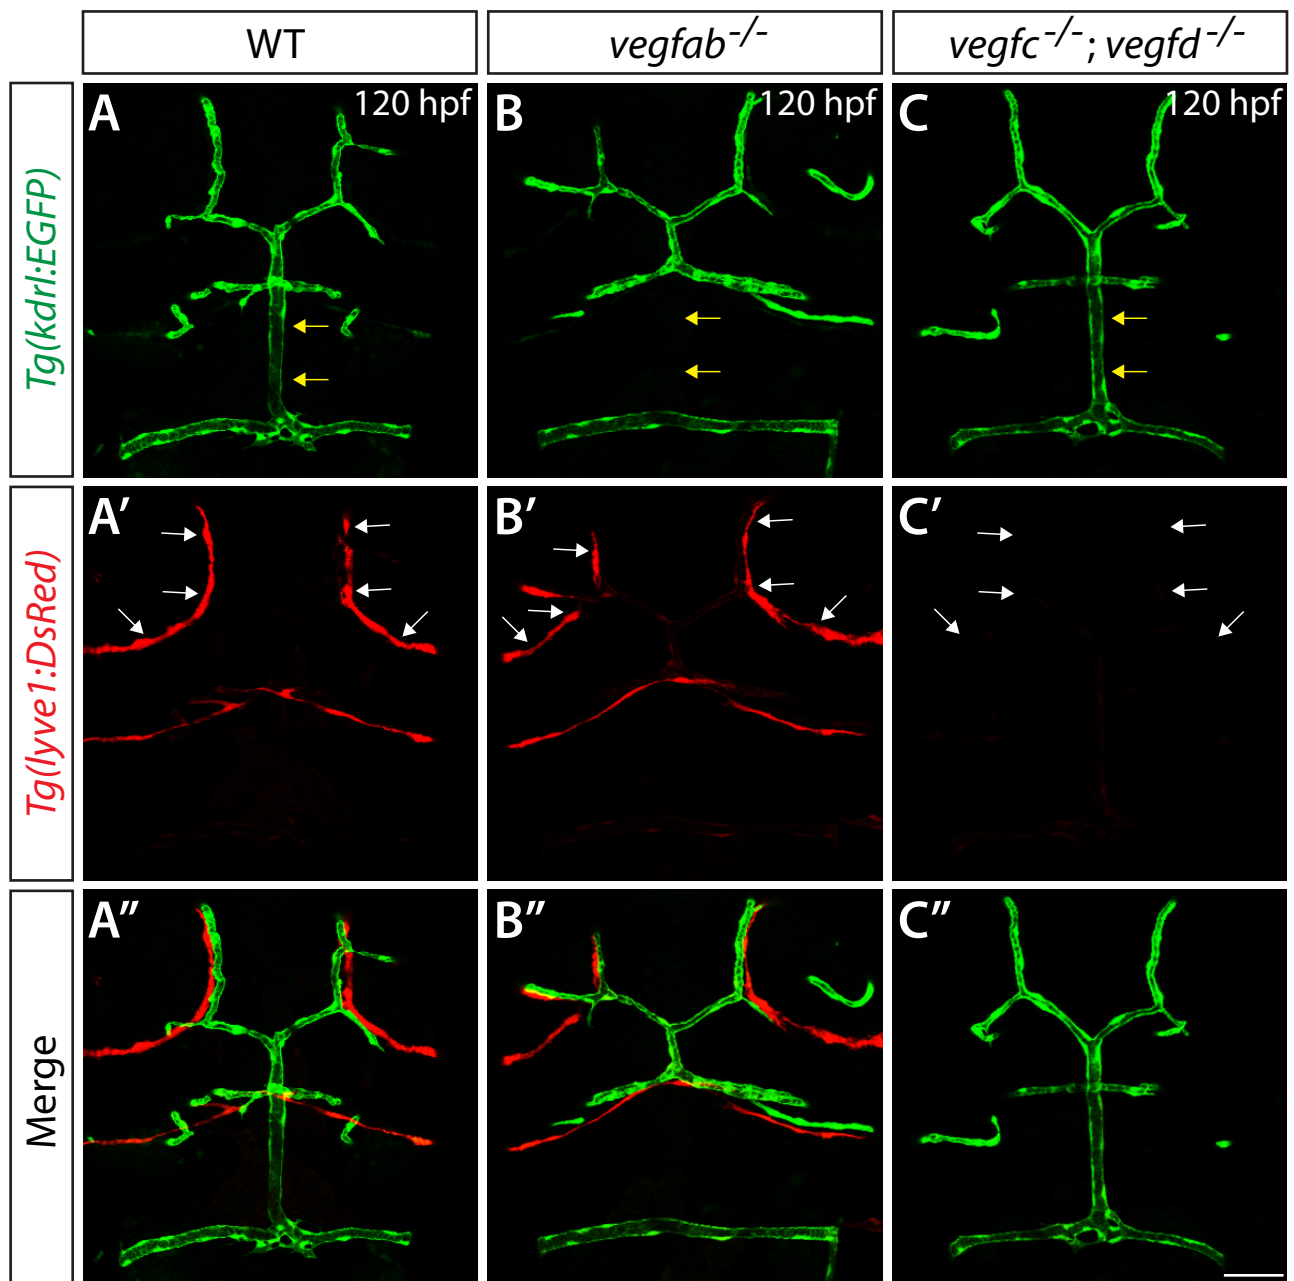

Supplement: supp [file elife-64295-supp-v1.zip]

Figure 1-figure supplement 2

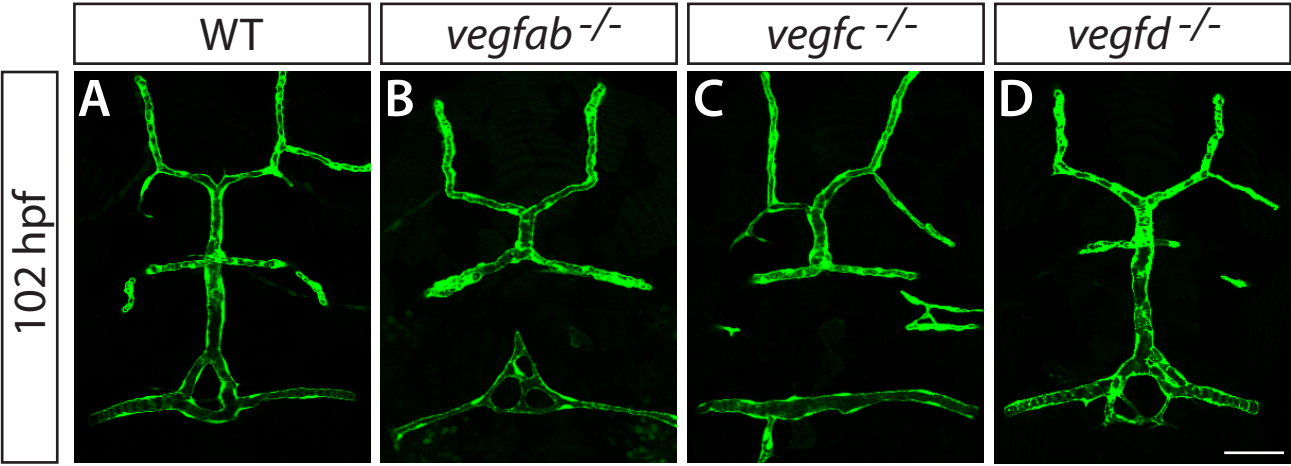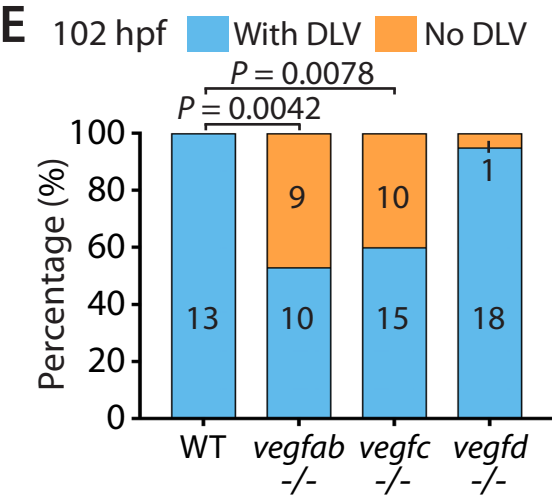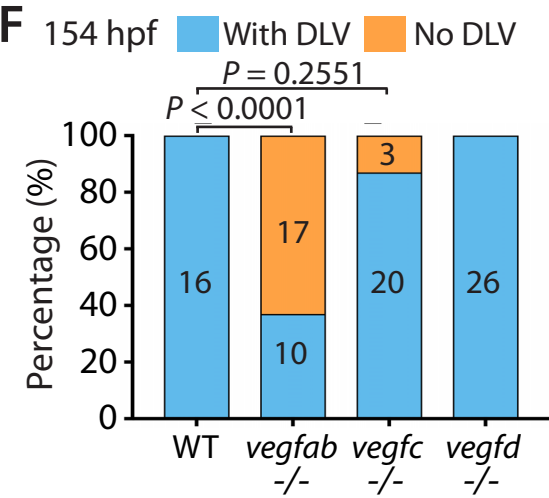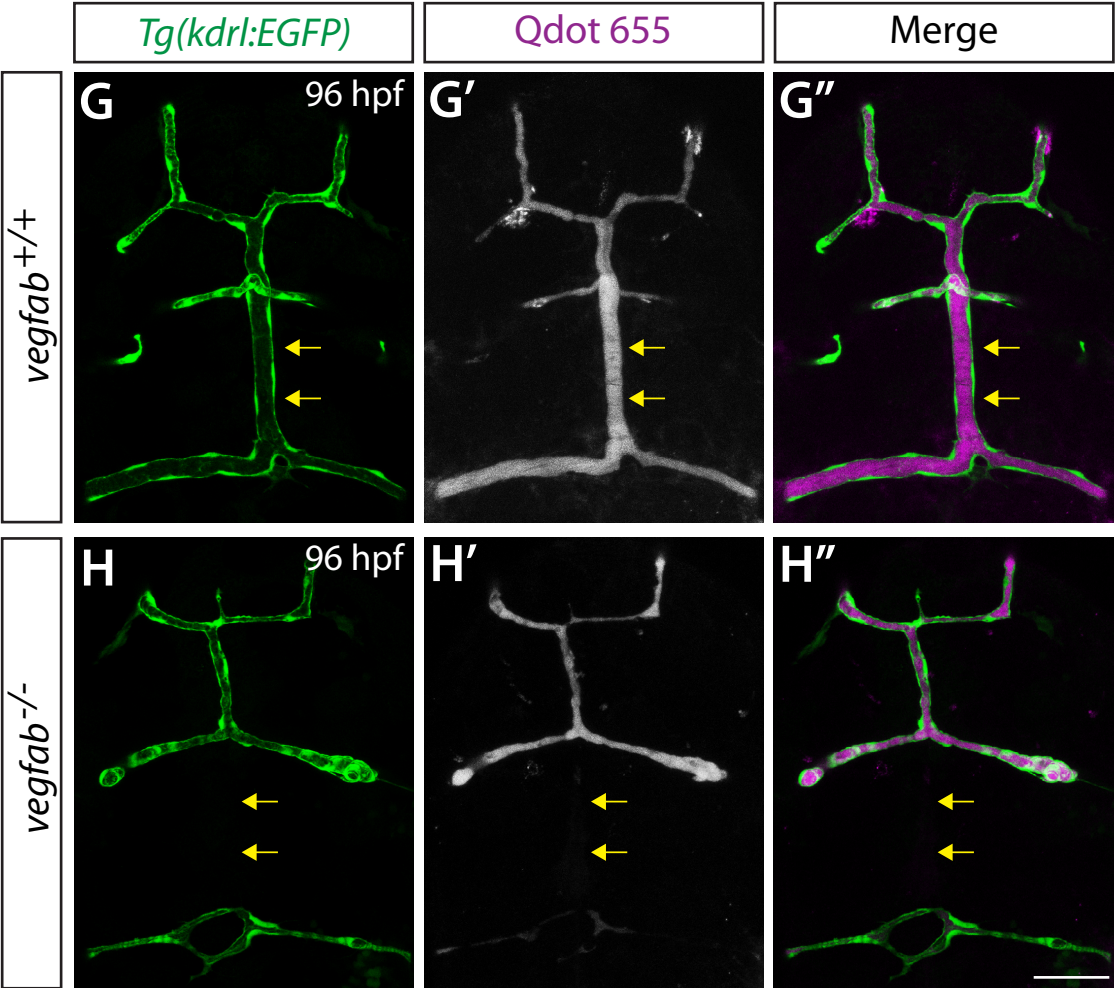

Supplement: supp [file elife-64295-supp-v1.zip]

# Figure 6-figure supplement 5

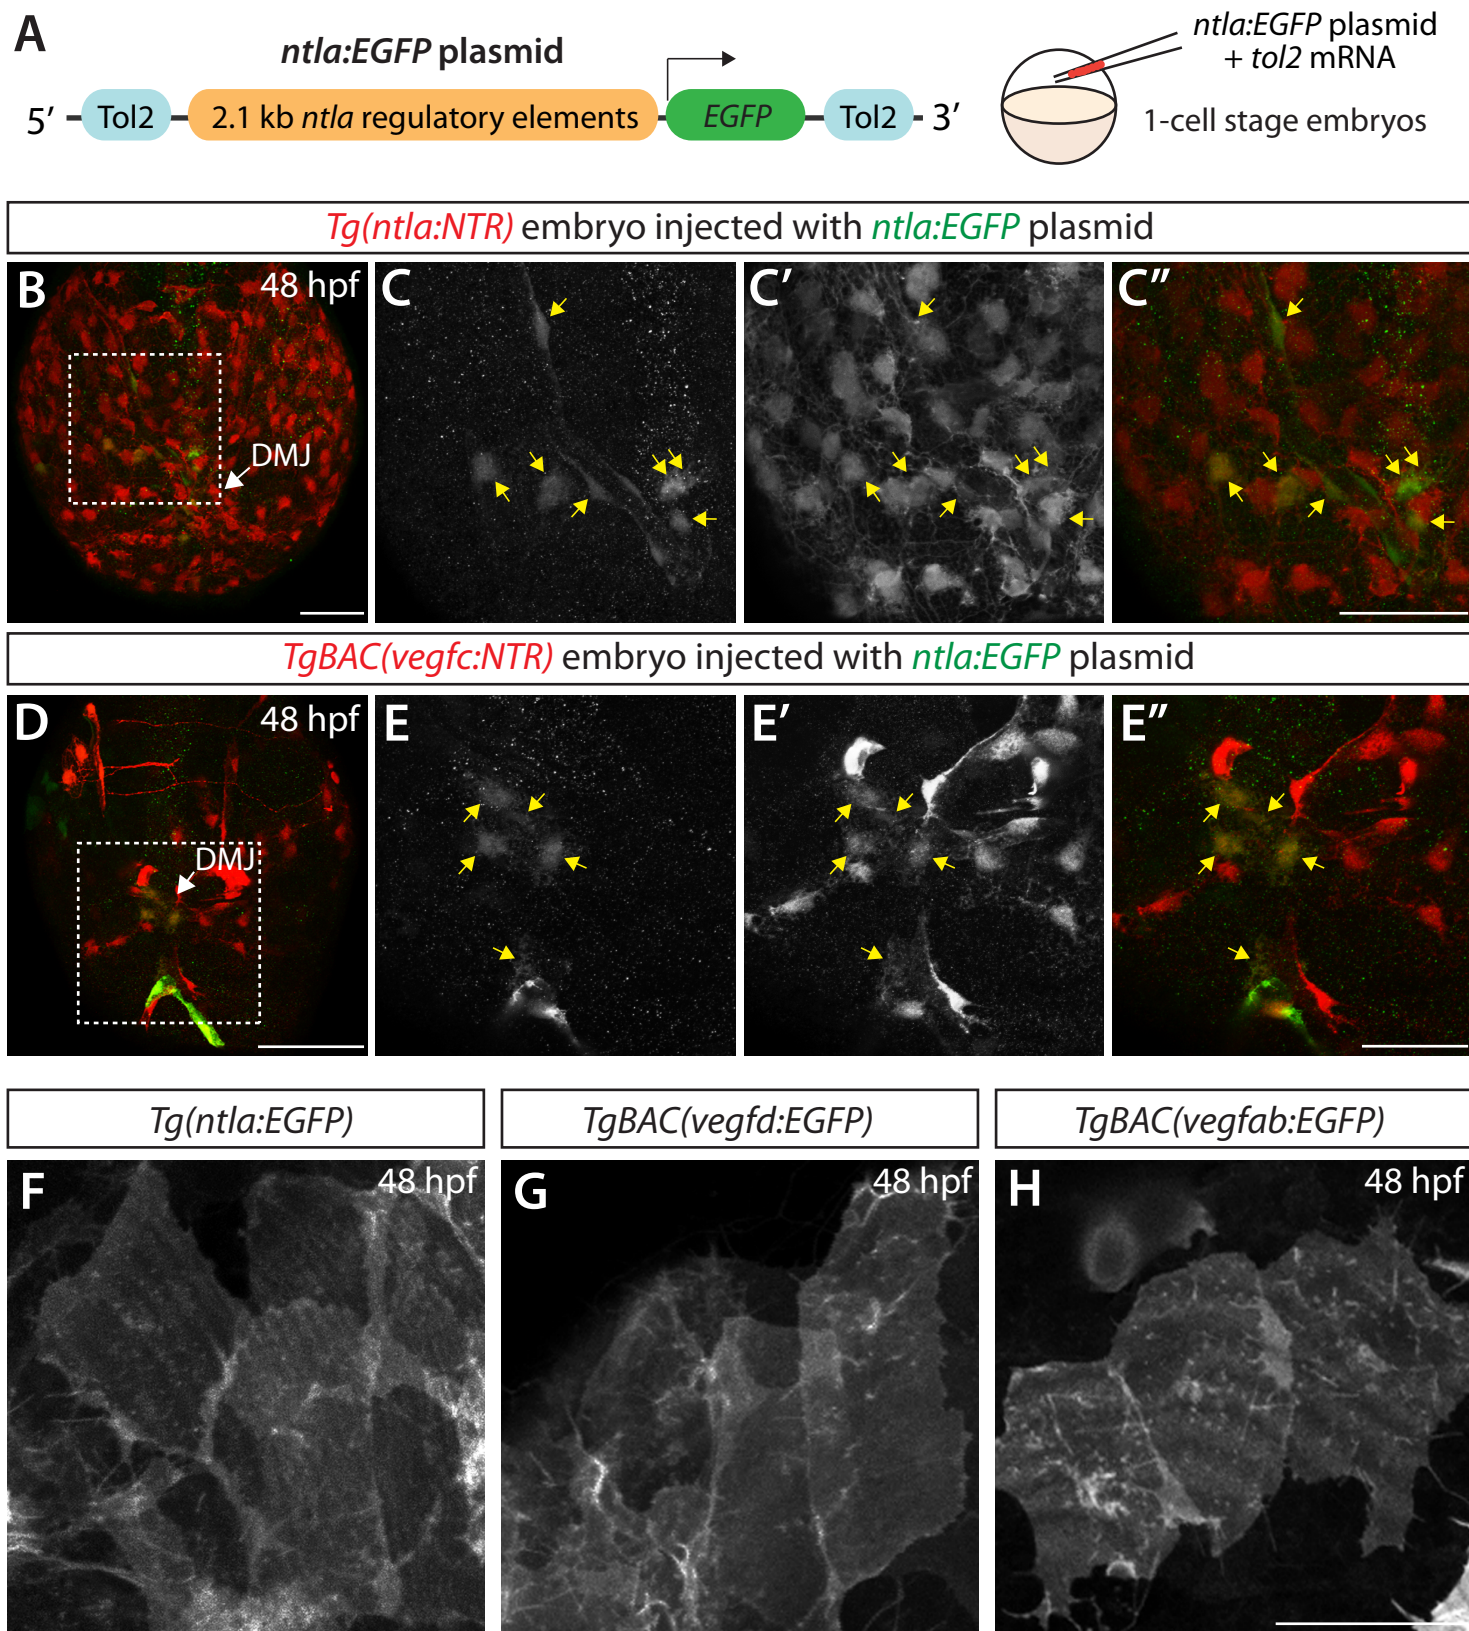

Supplement: supp [file elife-64295-supp-v1.zip]

Figure 6-figure supplement 3

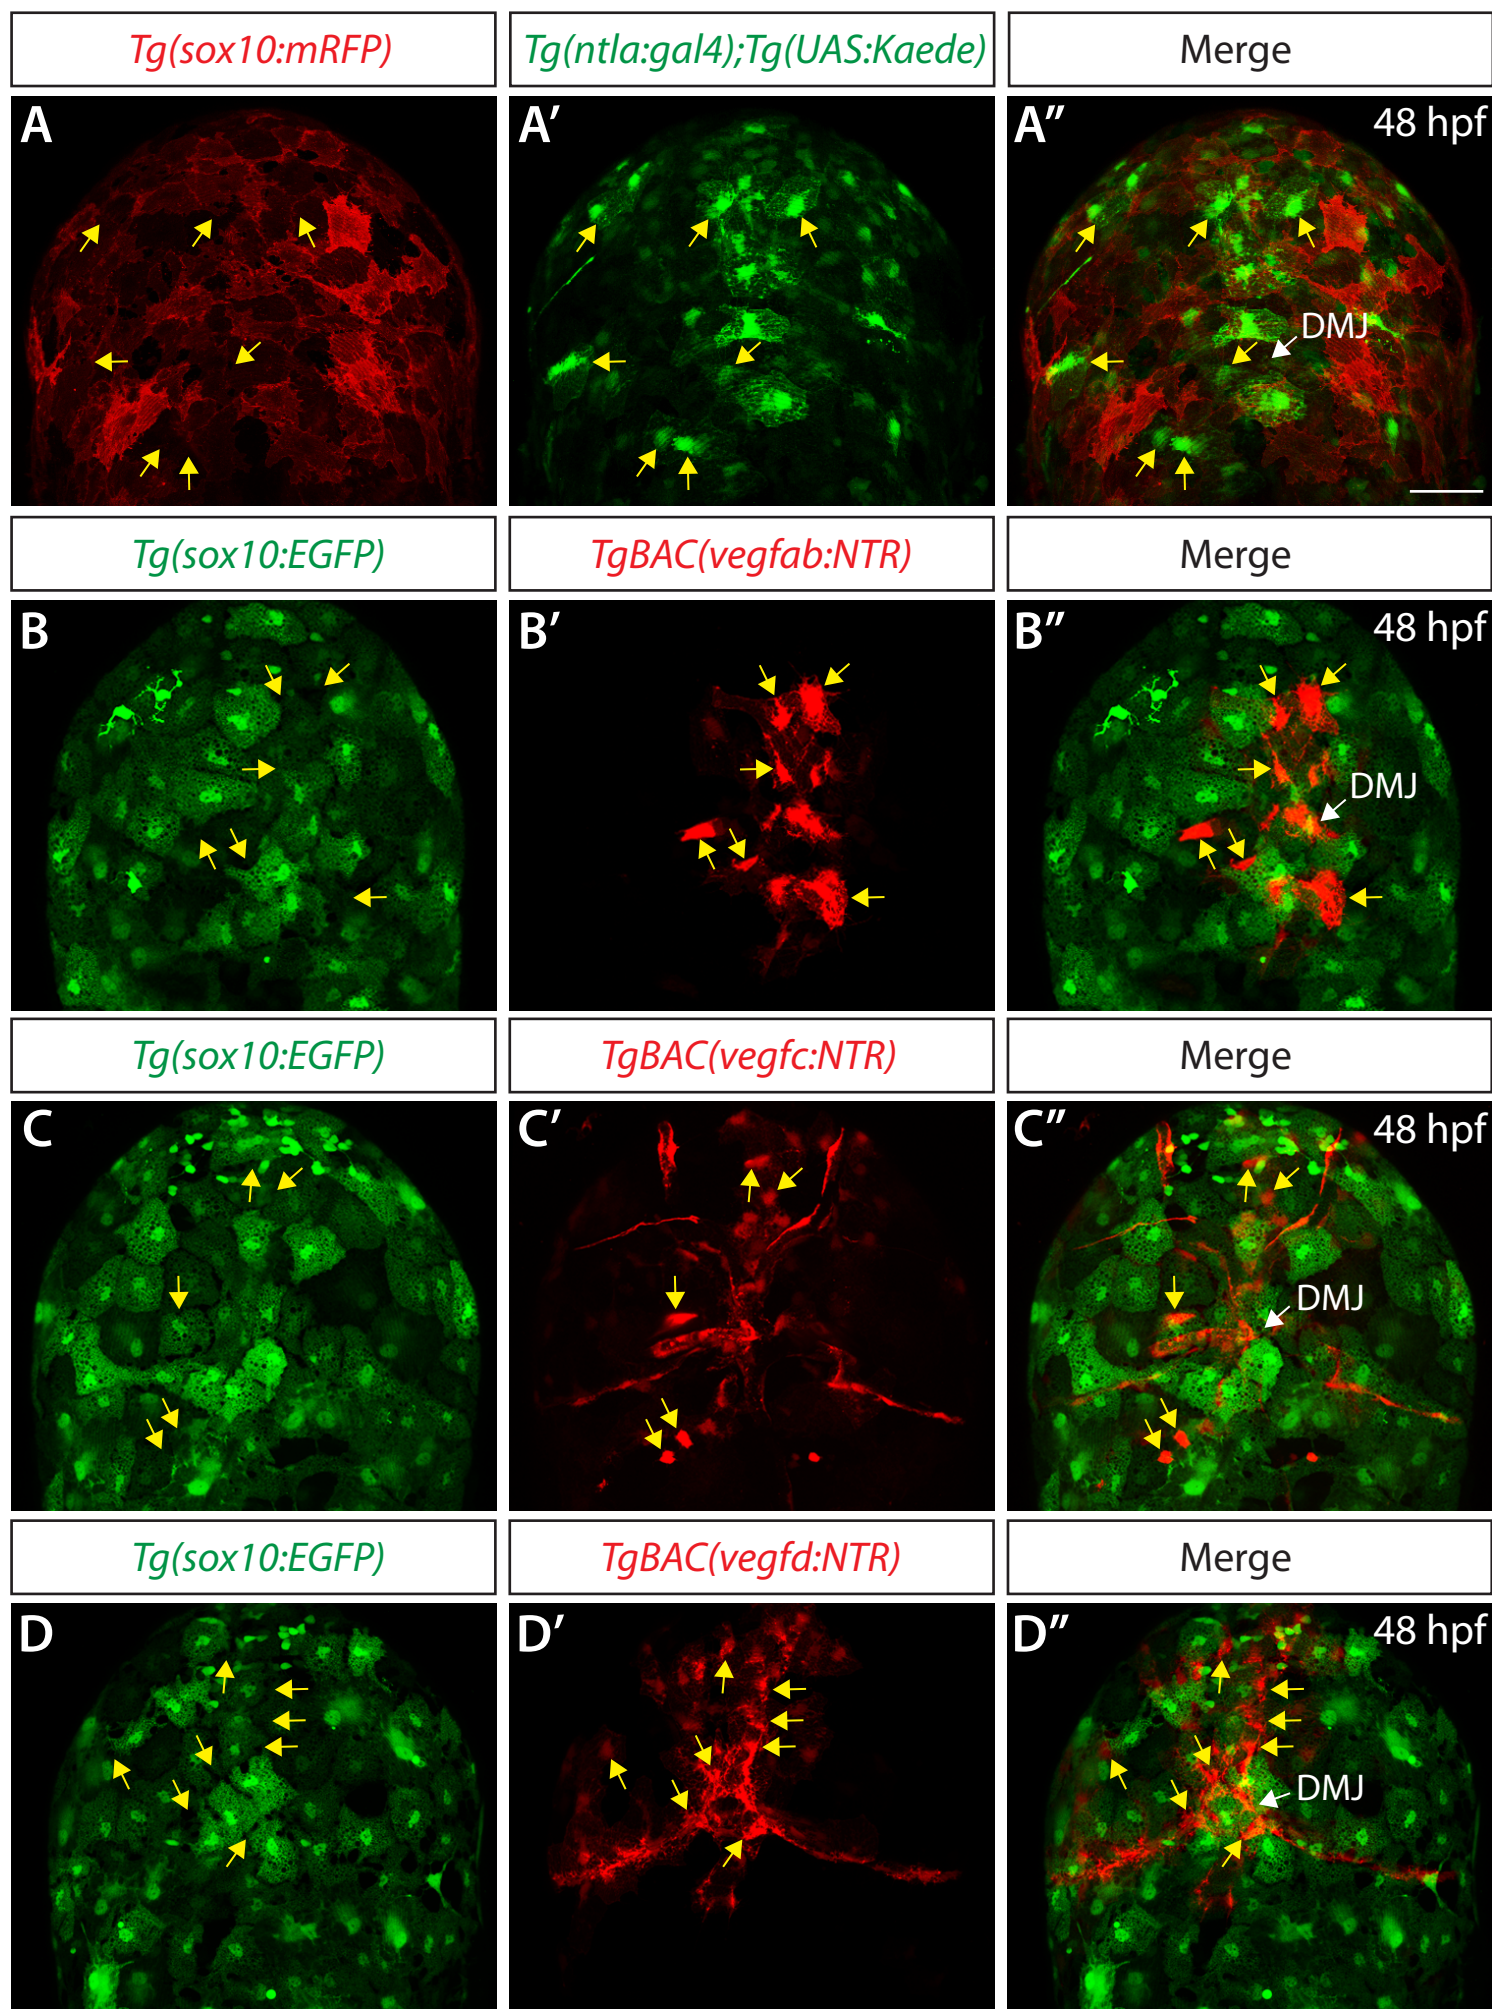

Supplement: supp [file elife-64295-supp-v1.zip]

Figure 2-figure supplement 1

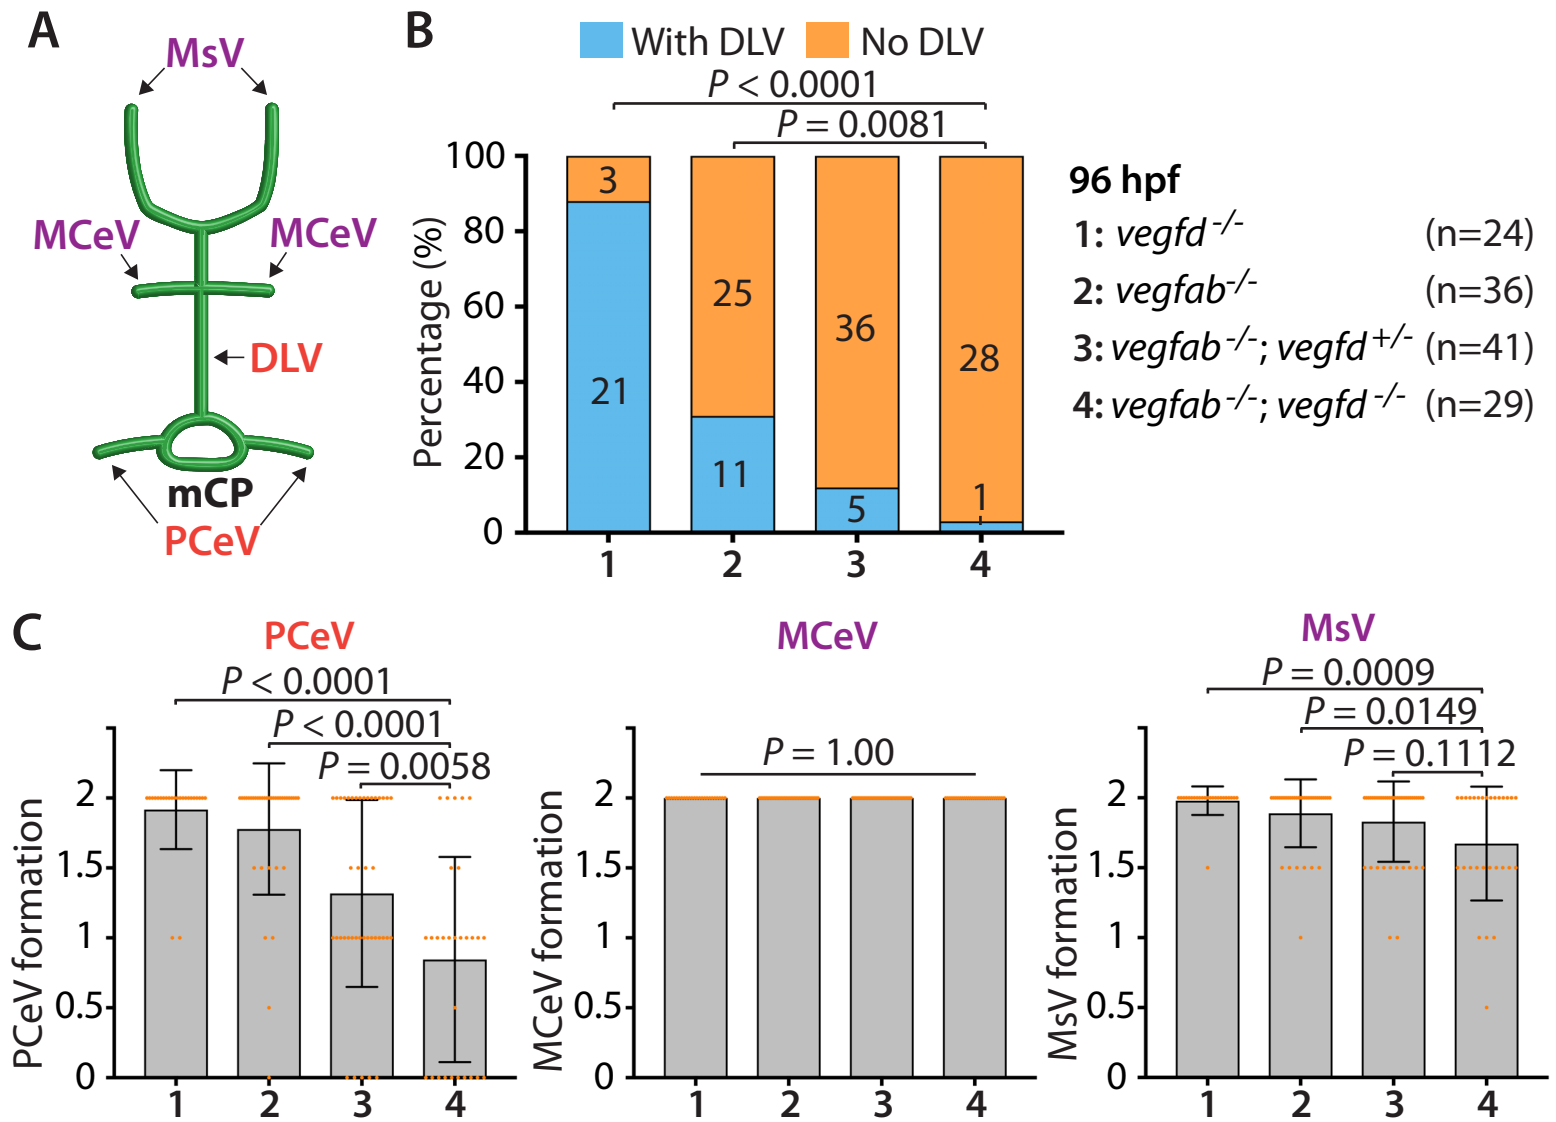

Supplement: supp [file elife-64295-supp-v1.zip]
